# Supplementary material
Source: PubMed Central journal article supplement (PMC8777566)
Supplement: jamaoncol-e215672-s001.pdf [file jamaoncol-e215672-s001.pdf]

## Supplementary Online Content

Vettenranta A, Murtola TJ, Raitanen J, et al. Outcomes of screening for prostate cancer among men who use statins. Published online November 24, 2021. *JAMA Oncol*. doi:10.1001/jamaoncol.2021.5672

**eFigure.** Distribution of PSA Values by Statin Use Before Prostate Cancer Diagnosis

**eTable 1.** Descriptive Characteristics Information About Gleason Grades and Metastatic Status by Statin Use

**eTable 2.** Effect of PSA-Based Screening on Incidence of Prostate Cancer Overall and Clinically Nonsignificant Disease as Defined by Gleason Score and TNM Stage

**eTable 3.** Effect of Screening on Prostate Cancer–Specific Mortality Among Users and Nonusers of Statins

**eTable 4.** Prostate Cancer Incidence Among Statin Users by Statin Dose

This supplementary material has been provided by the authors to give readers additional information about their work.

**eFigure.** Distribution of PSA Values by Statin Use Before Prostate Cancer Diagnosis

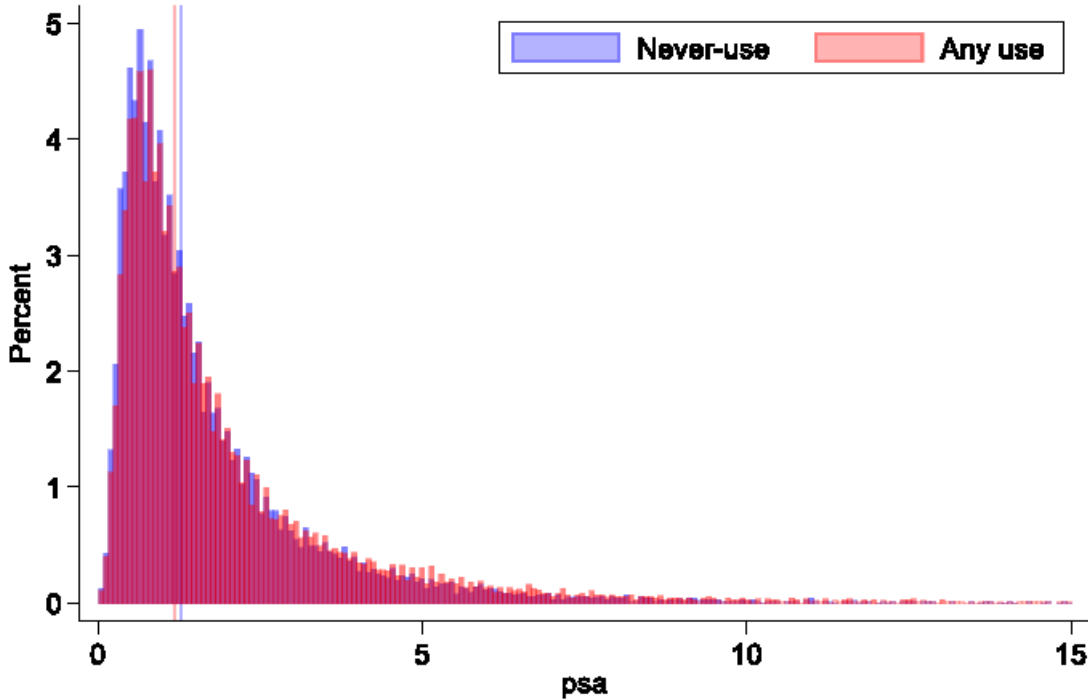

**eTable 1.** Descriptive Characteristics Information About Gleason Grades and Metastatic Status by Statin Use

Study population of 78,606 men from the Finnish Randomized Study of Prostate Cancer Screening.

|                                       | FinRSPC study arm |                  |              |                  |
|---------------------------------------|-------------------|------------------|--------------|------------------|
|                                       | Screening arm     |                  | Control arm  |                  |
|                                       | Statin users      | Statin non-users | Statin users | Statin non-users |
| Number of participants                | 12,059            | 18,277           | 19,567       | 28,703           |
| Tumor grade at diagnosis              |                   |                  |              |                  |
| Gleason 6 or less; n (% of diagnoses) | 549 (51%)         | 1,575 (61%)      | 690 (40%)    | 1,464 (46%)      |
| Gleason 7; n (%)                      | 319 (30%)         | 639 (25%)        | 630 (37%)    | 1,020 (32%)      |
| Gleason 8-10; n (%)                   | 190 (18%)         | 334 (13%)        | 363 (21%)    | 585 (18%)        |
| Unknown                               | 14 (1%)           | 52 (2%)          | 35 (2%)      | 103 (3%)         |
| Tumor T-stage at diagnoses            |                   |                  |              |                  |
| T1/T2                                 | 895 (83%)         | 2,196 (84%)      | 1,335 (78%)  | 2,369 (75%)      |
| T3                                    | 144 (13%)         | 320 (12%)        | 305 (18%)    | 618 (19%)        |
| T4                                    | 29 (3%)           | 71 (3%)          | 66 (4%)      | 165 (5%)         |
| Unknown                               | 4 (0.4%)          | 13 (0.5%)        | 12 (1%)      | 20 (1%)          |
| Tumor M-stage at diagnosis            |                   |                  |              |                  |
| Localized (M0/x); n (%)               | 986 (92%)         | 2,398 (92%)      | 1,552 (90%)  | 2,784 (88%)      |
| Metastatic (M1); n (%)                | 86 (8%)           | 202 (8%)         | 164 (10%)    | 387 (12%)        |

FinRSPC = Finnish Randomized Study of Screening for Prostate Cancer

**eTable 2.** Effect of PSA-Based Screening on Incidence of Prostate Cancer Overall and Clinically Nonsignificant Disease as Defined by Gleason Score and TNM Stage

Study population of 78,606 men from the Finnish Randomized Study of Screening for Prostate Cancer

| Status of statin use none/any  | PCa incidence, overall | Gleason 6 or less | Localized prostate cancer | Gleason 7        | Gleason 8-10     | Advanced PCa <sup>a</sup> |
|--------------------------------|------------------------|-------------------|---------------------------|------------------|------------------|---------------------------|
|                                | RR (95% CI)            | RR (95% CI)       | RR (95% CI)               | RR (95% CI)      | RR (95% CI)      | RR (95% CI)               |
| n of users/non-users           | 31,625/46,978          | 29,856/43,966     | 31,337/46,338             | 29,620/42,610    | 29,178/41,831    | 28,828/41,436             |
| Never-use of statins           | 1.31 (1.24-1.38)       | 1.70 (1.58-1.82)  | 1.37 (1.30-1.45)          | 1.00 (0.91-1.11) | 0.91 (0.80-1.04) | 0.83 (0.70-0.99)          |
| Any use of statins             | 1.02 (0.95-1.10)       | 1.29 (1.15-1.44)  | 1.04 (0.96-1.13)          | 0.83 (0.72-0.95) | 0.85 (0.72-1.02) | 0.85 (0.66-1.11)          |
| P for interaction              | <0.001                 | <0.001            | <0.001                    | 0.02             | 0.56             | 0.90                      |
| <b>Intensity of statin use</b> |                        |                   |                           |                  |                  |                           |
| Under 0.65 defined dose/day    | 0.96 (0.85-1.08)       | 1.31 (1.11-1.56)  | 0.99 (0.87-1.12)          | 0.68 (0.54-0.85) | 0.74 (0.55-0.99) | 0.67 (0.44-1.03)          |
| 0.65 – 1.08 defined dose/day   | 1.09 (0.96-1.25)       | 1.36 (1.12-1.65)  | 1.13 (0.98-1.29)          | 0.89 (0.71-1.13) | 0.89 (0.66-1.20) | 0.81 (0.51-1.28)          |
| Over 1.08 defined dose/day     | 1.02 (0.88-1.18)       | 1.12 (0.88-1.41)  | 1.00 (0.86-1.17)          | 0.96 (0.75-1.22) | 0.96 (0.69-1.33) | 1.24 (0.76-2.02)          |

Abbreviations: FinRSPC= Finnish Randomized Study of Screening for Prostate Cancer, RR = rate ratio, CI = confidence interval, PSA = Prostate-specific antigen <sup>a</sup> Prostate cancer cases with T-stage T3b or higher, all N1 and M1

**eTable 3.** Effect of Screening on Prostate Cancer–Specific Mortality Among Users and Nonusers of Statins

Study population of 78,606 men from the Finnish Randomized Study of Screening for Prostate Cancer

| Status of statin use none/any  | FinRSPC control arm             |  | FinRSPC screening arm           |  |
|--------------------------------|---------------------------------|--|---------------------------------|--|
|                                | N of men/prostate cancer deaths |  | N of men/prostate cancer deaths |  |
| Never-use of statins           | 28,701/372                      |  | 18,277/212                      |  |
| Any use of statins             | 19,566/125                      |  | 12,059/75                       |  |
| P for interaction              |                                 |  | 0.50                            |  |
| <b>Intensity of statin use</b> |                                 |  |                                 |  |
| Under 0.65 defined dose/day    | 6,486/55                        |  | 4,059/30                        |  |
| 0.65 – 1.08 defined dose/day   | 6,499/43                        |  | 4,042/25                        |  |
| Over 1.08 defined dose/day     | 6,581/27                        |  | 3,958/20                        |  |
|                                |                                 |  | RR (95% CI)                     |  |
|                                |                                 |  | 0.87 (0.73-1.03)                |  |
|                                |                                 |  | 0.97 (0.73-1.30)                |  |
|                                |                                 |  | 0.85 (0.54-1.32)                |  |
|                                |                                 |  | 0.95 (0.58-1.55)                |  |
|                                |                                 |  | 1.24 (0.70-2.22)                |  |

Abbreviations: FinRSPC= Finnish Randomized Study of Screening for Prostate Cancer, RR = rate ratio, CI = confidence interval

**eTable 4.** Prostate Cancer Incidence Among Statin Users by Statin Dose

Study population of 78,606 men from the Finnish Randomized Study of Screening for Prostate Cancer.

|                              | Screening Arm          |           | Control arm            |           |
|------------------------------|------------------------|-----------|------------------------|-----------|
| Intensity of statin use      | Incidence per 1000 pys | 95% CI    | Incidence per 1000 pys | 95% CI    |
| Under 0.65 defined dose/day  | 7.49                   | 6.79-8.24 | 7.74                   | 7.18-8.34 |
| 0.65 – 1.08 defined dose/day | 6.13                   | 5.52-6.78 | 5.65                   | 5.17-6.11 |
| Over 1.08 defined dose/day   | 4.46                   | 3.95-5.02 | 4.42                   | 4.03-4.84 |

Abbreviations: pys = person years CI = confidence interval
